# Supplementary material for: Genomic analysis of urogenital and rectal Neisseria meningitidis isolates reveals encapsulated hyperinvasive meningococci and coincident multidrug-resistant gonococci
Source: PubMed Central journal article supplement (PMC5574384; doi:10.1136/sextrans-2016-052781), 2017-01-30

**Table S1. Allelic profiles of loci associated with antimicrobial resistance (NEIS loci) and AMR phenotype (P).**

|                      | Beta-lactams                |                             |                             |                             |   | Fluoroquinolones            |                             |                             |   | Macrolides  |             |                             |   | Plasmids                    |                               | Efflux pump                 |                                                   |
|----------------------|-----------------------------|-----------------------------|-----------------------------|-----------------------------|---|-----------------------------|-----------------------------|-----------------------------|---|-------------|-------------|-----------------------------|---|-----------------------------|-------------------------------|-----------------------------|---------------------------------------------------|
|                      | NEIS0408<br>( <i>pilQ</i> ) | NEIS0414<br>( <i>ponA</i> ) | NEIS1753<br>( <i>penA</i> ) | NEIS2020<br>( <i>porB</i> ) | P | NEIS1320<br>( <i>gyrA</i> ) | NEIS1525<br>( <i>parC</i> ) | NEIS1600<br>( <i>parE</i> ) | P | 16S<br>rRNA | 23S<br>rRNA | NEIS0149<br>( <i>rpsE</i> ) | P | NEIS2210<br>( <i>tetM</i> ) | NEIS2357<br>( <i>blaTEM</i> ) | NEIS1635<br>( <i>mtrR</i> ) | <i>pro</i> NEIS1635<br>( <i>mtrR</i><br>promoter) |
| NM8250               | 71                          | 130                         | 5                           | 27                          | S | 9                           | 10                          | 25                          | S | *           | *           | 1                           | S | 0                           | 0                             | 37                          | 9                                                 |
| NM8307               | 277                         | 296                         | <b>371</b>                  | 1182                        | R | 287                         | 309                         | 206                         | S | 1542        | 522         | 1                           | S | 0                           | 0                             | 7                           | 5                                                 |
| NM8468               | 455                         | 2                           | <b>373</b>                  | 1183                        | I | 302                         | 311                         | 338                         | S | *           | *           | 1                           | S | 0                           | 0                             | 247                         | 5                                                 |
| NM8525               | 70                          | 62                          | 62                          | 199                         | S | 202                         | 19                          | 54                          | S | *           | 54          | 45                          | S | 0                           | 0                             | 10                          | 7                                                 |
| NM8558 <sup>a</sup>  | 456                         | 28                          | <b>375</b>                  | 1184                        | R | 303                         | 704                         | 339                         | S | 1543        | 523         | 1                           | S | 0                           | 0                             | 15                          | 6                                                 |
| NM8572               | 4                           | 11                          | <b>354</b>                  | 42                          | R | 249                         | 31                          | 7                           | S | *           | 524         | 1                           | S | 0                           | 0                             | OFF                         | 5                                                 |
| NM8583               | 455                         | 2                           | <b>373</b>                  | 1183                        | R | 302                         | 311                         | 338                         | S | *           | *           | 1                           | S | 0                           | 0                             | 247                         | 5                                                 |
| NM8602 <sup>a</sup>  | 33                          | 28                          | 33                          | 149                         | S | 35                          | 313                         | 56                          | S | 1384        | 525         | 1                           | S | 0                           | 0                             | 251                         | 5                                                 |
| NM8633               | 116                         | 1                           | 377 <sup>b</sup>            | 1                           | S | 1                           | 1                           | 1                           | S | *           | 1           | 1                           | S | 0                           | 0                             | 2                           | 5                                                 |
| NM8652               | 359                         | 7                           | <b>380</b>                  | 265                         | R | 255                         | 275                         | 288                         | S | *           | 526         | 1                           | S | 0                           | 0                             | 211                         | 5                                                 |
| NM8674 <sup>a</sup>  | 241                         | 28                          | <b>112</b>                  | 1185                        | I | 32                          | 30                          | 60                          | S | 1412        | 112         | 1                           | S | 0                           | 0                             | 7                           | 5                                                 |
| NM8726               | 455                         | 2                           | <b>373</b>                  | 1183                        | I | 302                         | 311                         | 338                         | S | *           | *           | 1                           | S | 0                           | 0                             | 247                         | 5                                                 |
| NM8736 <sup>a</sup>  | 16                          | 16                          | 5                           | 45                          | S | 32                          | 8                           | 25                          | S | 1341        | 1           | 0                           | S | 0                           | 0                             | 273                         | 5                                                 |
| NM9062               | 87                          | 2                           | 5                           | 260                         | S | 9                           | 135                         | 25                          | S | 1407        | 424         | 1                           | S | 0                           | 0                             | 107                         | 5                                                 |
| NM9071               | 347                         | 1                           | 41                          | 38                          | I | 31                          | 26                          | 280                         | S | 1324        | 528         | 1                           | S | 0                           | 0                             | 274                         | 5                                                 |
| NM9124 <sup>a</sup>  | 277                         | 61                          | 382                         | 477                         | R | 7                           | 314                         | 341                         | S | 1544        | *           | 1                           | S | 0                           | 0                             | 275                         | 5                                                 |
| NM9565               | 16                          | 129                         | <b>112</b>                  | 42                          | R | 248                         | 17                          | 25                          | S | 1310        | 20          | 1                           | S | 0                           | 0                             | 9                           | 5                                                 |
| NM9658 <sup>a</sup>  | 359                         | 7                           | <b>380</b>                  | 1186                        | R | 255                         | 275                         | 288                         | S | 1           | *           | 1                           | S | 0                           | 0                             | 211                         | 5                                                 |
| NM9853               | 457                         | 2                           | 5                           | 1187                        | S | 9                           | 135                         | 25                          | S | 1310        | 20          | 1                           | S | 0                           | 0                             | 9                           | 5                                                 |
| NM9905               | 347                         | 1                           | 41                          | 38                          | S | 31                          | 26                          | 280                         | S | 1324        | 528         | 1                           | S | 0                           | 0                             | 7                           | 5                                                 |
| NM9954               | 16                          | 1                           | 3                           | 1                           | S | 1                           | 1                           | 1                           | S | *           | 1           | 1                           | S | 0                           | 0                             | 8                           | 5                                                 |
| NM10052              | 99                          | 68                          | 88                          | 198                         | S | 10                          | 29                          | 54                          | S | 1379        | 191         | 45                          | S | 0                           | 0                             | 59                          | 5                                                 |
| NM10053              | 99                          | 68                          | 88                          | 198                         | I | 10                          | 29                          | 54                          | S | 1379        | 191         | 45                          | S | 0                           | 0                             | 59                          | 5                                                 |
| NM10313              | 109                         | 45                          | 8                           | 67                          | S | 107                         | 70                          | 79                          | S | 1332        | 529         | 1                           | S | 0                           | 0                             | 7                           | 5                                                 |
| NM10364 <sup>a</sup> | 458                         | 78                          | <b>319</b>                  | 126                         | R | 255                         | 275                         | 288                         | S | *           | 526         | 1                           | S | 0                           | 0                             | 211                         | 5                                                 |
| NM10421 <sup>a</sup> | 4                           | 64                          | 38                          | 477                         | S | 304                         | 47                          | 58                          | S | 1386        | 197         | 1                           | S | 0                           | 0                             | 35                          | 5                                                 |
| NM10492              | 109                         | 297                         | 385                         | 1188                        | R | 305                         | 309                         | 348                         | S | 1545        | 530         | 1                           | S | 0                           | 0                             | 57                          | 10                                                |
| NM10762              | 109                         | 45                          | 8                           | 262                         | S | 107                         | 70                          | 79                          | S | 1332        | 268         | 1                           | S | 0                           | 0                             | 7                           | 5                                                 |
| NM10763 <sup>a</sup> | 277                         | 298                         | 382                         | 1189                        | R | 7                           | 314                         | 341                         | S | 1544        | *           | 1                           | S | 0                           | 0                             | 275                         | 5                                                 |
| NM10833              | 459                         | 45                          | <b>352</b>                  | 234                         | R | 9                           | 17                          | 25                          | S | *           | 20          | 1                           | S | 0                           | 0                             | 8                           | 5                                                 |
| NM10853              | 3                           | 6                           | <b>109</b>                  | 27                          | S | 20                          | 13                          | 19                          | S | 1546        | 531         | 1                           | S | 0                           | 0                             | 41                          | 5                                                 |

|         |     |     |            |      |   |    |    |    |   |      |     |   |   |   |   |     |   |
|---------|-----|-----|------------|------|---|----|----|----|---|------|-----|---|---|---|---|-----|---|
| NM10863 | 7   | 2   | 386        | 45   | S | 9  | 84 | 25 |   | 1547 | 20  | 1 | S | 0 | 0 | 276 | 5 |
| NM10864 | 16  | 129 | <b>112</b> | 42   | I | 9  | 17 | 25 | S | 1310 | 20  | 1 | S | 0 | 0 | 9   | 5 |
| NM10989 | 4   | 64  | <b>388</b> | 43   | I | 79 | 47 | 58 | S | 1548 | 197 | 1 | S | 0 | 0 | 8   | 5 |
| NM11067 | 460 | 19  | 5          | 1063 | S | 32 | 8  | 36 | S | 1344 | 20  | 1 | S | 0 | 0 | 9   | 5 |

a: dual *N. meningitidis*/*N. gonorrhoeae* infections; b: *penA* allele more commonly found in *N. gonorrhoeae*; \* incomplete locus; OFF premature stop codon in locus putatively resulting in loss of function; bold alleles denote the presence of known mutations associated with conferring resistance as described previously [1].

P denotes phenotypic AMR deduced from MIC values with S: susceptible (MIC  $\leq$  0.06), I: intermediate (MIC 0.007 – 0.24), R: resistant (MIC  $\geq$  0.25).

Figure S1. Further genomic analyses of cc41/44 and cc4821 *N. meningitidis* isolates

A.

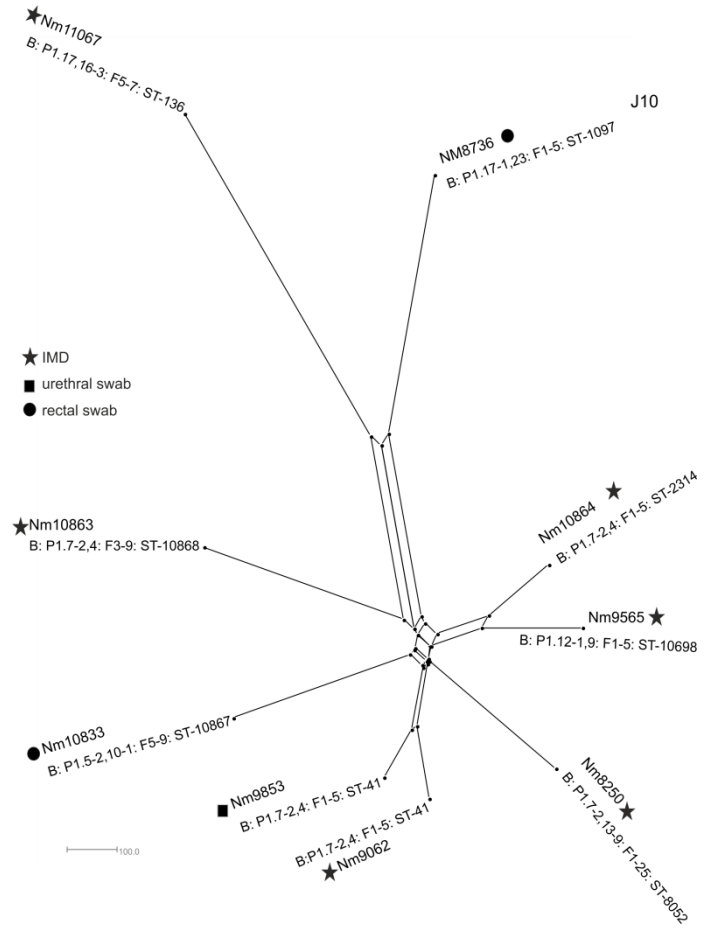

**B.**

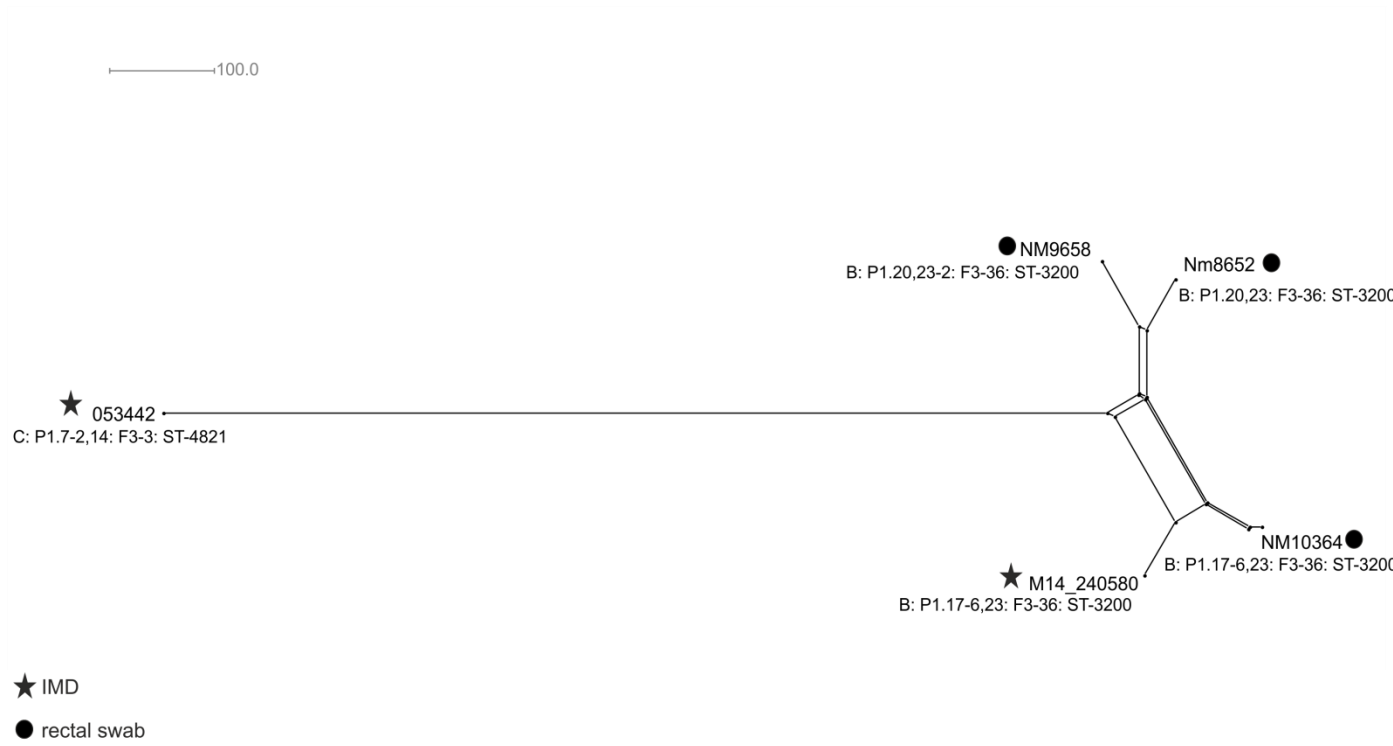

Supplement: sextrans-2016-052781supp001.pdf [file sextrans-2016-052781supp001.pdf]
